# Supplementary material
Source: MDPI journal article supplement (https://www.mdpi.com/2071-1050/14/3/1523)
Supplement: s1 [file s1 › sustainability-1413582-supplementary.pdf]

## Supplementary Material

### *Investigating Performance Outcomes Under Institutional Pressures and Environmental Orientation Motivated Green Supply Chain Management Practice*

**Table S1: Summary Table for Aspects and Practices**

| (1) Institutional Pressure (IP)                                                                                                                                    |                     |
|--------------------------------------------------------------------------------------------------------------------------------------------------------------------|---------------------|
| Institutional Pressure (Coercive) (IPC)                                                                                                                            |                     |
| IPC1- The green environmental management of our firm will be influenced by national environmental regulations (such as waste emission, cleaner production, etc.)   |                     |
| IPC2- The green environmental management of our firm will be influenced by regional environmental regulations (such as waste emissions, cleaner production, etc.). | [8,11,21,35,66,67]  |
| IPC3- The green environmental management of our firm will be influenced by regional resource saving and protection regulations.                                    |                     |
| IPC4- The green environmental management of our firm will be influenced by national resource saving and conservation regulations.                                  |                     |
| Institutional Pressure (Normative) (IPN)                                                                                                                           |                     |
| IPN1- In order to respond to the green environmental protection tendency, our firm will consider the effect on export.                                             |                     |
| IPN2- In order to respond to the green environmental protection tendency, our firm will consider the effect on sales to foreign customers.                         | [8,11,21,35,66,67]  |
| IPN3- In order to respond to the green environmental protection tendency, our firm will consider the effect on environmental requirements from domestic customers. |                     |
| IPN4- For our firm, establishing the company’s green image is extremely important.                                                                                 |                     |
| Institutional Pressure (Mimetic) (IPM)                                                                                                                             |                     |
| IPM1- The green environmental management of our firm will be affected by competitors’ green environmental management protection strategy.                          |                     |
| IPM2- The green environmental management of our firm will be affected by substitute products’ green environmental strategy.                                        | [8,11,21,35,66,67]  |
| IPM3- The green environmental management of our firm will be affected by professional environmental protection groups.                                             |                     |
| (2) Environmental Orientation (EO)                                                                                                                                 |                     |
| Internal Environmental Orientation (IEO)                                                                                                                           |                     |
| IEO1- Environmental responsibility is important to our business unit.                                                                                              |                     |
| IEO2- Our company has clear policy statements urging environmental awareness in every area of operations.                                                          |                     |
| IEO3- Environmental protection is highly valued by our company members.                                                                                            | [11,19,21,65,68,69] |
| IEO4- Environmental responsibility is a central corporate value of our company.                                                                                    |                     |
| IEO5- Our company makes concerted efforts to help every employee understand the importance of environmental protection.                                            |                     |
| External Environmental Orientation (EEO)                                                                                                                           |                     |
| EEO1- Developments in the natural environment affect our company’s business activities.                                                                            |                     |
| EEO2- Our environmental responsibility affects our company’s financial performance.                                                                                |                     |
| EEO3- Environmental responsibility is important to our company’s survival.                                                                                         | [11,19,21,65,68,69] |
| EEO4- The ability of our business unit to create a positive image of environmental responsibility is important.                                                    |                     |
| EEO5- Various external stakeholders expect our company to protect the environment.                                                                                 |                     |
| (3) Green supply chain practices                                                                                                                                   |                     |
| Supplier Environmental Collaboration (SEC)                                                                                                                         |                     |
| SEC1- Our firm collaborates with suppliers to build programs to reduce or eliminate waste                                                                          |                     |
| SEC2- Our firm shares environmental management techniques and knowledge.                                                                                           |                     |
| SEC3- Our firm monitors environmental compliance status and practices of supplier’s operations                                                                     | [4,12,23,70–80]     |
| SEC4- Our firm collaborates with suppliers to manage reverse flows of materials and packaging                                                                      |                     |
| SEC4- Our firm communicates goals of sustainability to suppliers                                                                                                   |                     |
| SEC5- Our firm helps suppliers to establish their own environmental management system                                                                              |                     |
| Customer Environmental Collaboration (CEC)                                                                                                                         |                     |
| CEC1- Our firm cooperates with customers to produce eco-designs                                                                                                    |                     |
| CEC2- Our firm cooperates with customers to design cleaner production processes                                                                                    |                     |
| CEC3- Our firm cooperates with customers for using less energy during products transportation                                                                      | [12,23,79– 87]      |
| CEC4- Our firm cooperates with customers with the returned products                                                                                                |                     |
| CEC5- Our firm cooperates with customers in reverse logistics relationships                                                                                        |                     |

|                                                                                                                                            |                                               |
|--------------------------------------------------------------------------------------------------------------------------------------------|-----------------------------------------------|
| CEC6- Our firm applies practices to provide consumers with information on environmentally friendly products and on production methods      |                                               |
| CEC7- Our firm cooperates with customers for green packaging                                                                               |                                               |
| Internal Environmental Management (IEM)                                                                                                    |                                               |
| IEM1- Our firm emphasizes environmental management systems - ISO 14001 certification                                                       |                                               |
| IEM2- Our firm emphasizes Green manufacturing                                                                                              |                                               |
| IEM3- Our firm emphasizes Green packaging                                                                                                  |                                               |
| IEM4- Our firm emphasizes Green product use                                                                                                |                                               |
| IEM5- Our firm emphasizes Green/Clean production                                                                                           |                                               |
| IEM6- Our firm emphasizes Green stock practices                                                                                            |                                               |
| IEM7- Our firm adopts total quality management with emphasis on the environment                                                            |                                               |
| IEM8- Our firm emphasizes replacement of toxic inputs by environmentally correct inputs                                                    | [8,11,70,72,82,85,87– 90]                     |
| IEM9- Our firm emphasizes the use of fewer inputs to minimize environmental risks and impacts                                              |                                               |
| IEM10- Our firm emphasizes internal recycling of inputs, materials, and waste                                                              |                                               |
| IEM11- Our firm emphasizes the use of ecolabels, taking into account environmental criteria                                                |                                               |
| IEM12- Our company senior managers are committed to green supply chain management                                                          |                                               |
| IEM13- Our firm emphasizes cross-functional cooperation for environmental improvements                                                     |                                               |
| IEM14- Our firm emphasizes environmental compliance and auditing programs                                                                  |                                               |
| IEM15- Our firm has pollution prevention plans                                                                                             |                                               |
| IEM16- Our firm has a system to track environmental laws and regulations                                                                   |                                               |
| Eco-design (ECD)                                                                                                                           |                                               |
| ECD1- Our firm emphasizes design of products for reduced consumption of material/energy                                                    |                                               |
| ECD2- Our firm emphasizes design products for reuse, recycling, recovery of materials, and components                                      |                                               |
| ECD3- Our firm emphasizes design products to avoid or reduce the use of hazardous products in the manufacturing process.                   | [4,23,25,73,77,83– 87,91–96]                  |
| ECD4- Our firm emphasizes design products for environmentally friendly objectives                                                          |                                               |
| ECD5- Our firm emphasizes design of products to reduce use of harmful/toxic material                                                       |                                               |
| ECD6- Our firm emphasizes optimization of design process to reduce air emission and noise                                                  |                                               |
| Reverse Logistics (RLG)                                                                                                                    |                                               |
| RLG1- Our firm emphasizes reverse logistic                                                                                                 |                                               |
| RLG2- Our firm emphasizes collection and recycling of end-of-life products and materials                                                   |                                               |
| RLG3- Our firm adopts establishment of a transport system for the recycling of used and defective end-of-life products                     |                                               |
| RLG4- Our firm emphasizes the collection, management, and disposal of the product at the end of its life cycle                             | [12 23,25,67,78,80,85,88,92,94– 99]           |
| RLG5- Our firm emphasizes return process of product packaging after use                                                                    |                                               |
| RLG6- Our firm emphasizes the recondition and refurbishing of used parts or components                                                     |                                               |
| RLG7- Our firm emphasizes the resale or reuse of used parts or components                                                                  |                                               |
| RLG8- Our firm emphasizes the use of remanufacturing                                                                                       |                                               |
| Investment Recovery (INR)                                                                                                                  |                                               |
| INR1- Our firm emphasizes the sale of scrap, used materials, and surplus stocks                                                            |                                               |
| INR2- Our firm emphasizes the recovery of company equipment at end of life                                                                 | [75,76,82,91]                                 |
| INR3- Our firm emphasizes the sale of unused raw materials                                                                                 |                                               |
| Green Information Technology and Systems (GITS)                                                                                            |                                               |
| GITS1- Our firm uses energy-efficient hardware and data centers                                                                            |                                               |
| GITS2- Our firm Consolidates servers using virtualization software                                                                         |                                               |
| GITS3- Our firm aims to reduce the waste associated with obsolete equipment telepresence systems                                           | [22,47,100]                                   |
| GITS4- Our firm supports the Cooperative Group software                                                                                    |                                               |
| GITS5- Our firm Uses Eco-labelling of IT products                                                                                          |                                               |
| Green Compliance (GCM)                                                                                                                     |                                               |
| GCM1- Our firm compliances with environmental laws in relation to international agreements and national guidelines                         |                                               |
| GCM2- Our firm emphasizes environmental management and Legal compliance                                                                    |                                               |
| GCM3- Our firm emphasizes compliance and environmental auditing programs, including environmental requirements of regulators and customers | [25,73,91,101]                                |
| GCM4- Our firm emphasizes compliance and environmental auditing for internal supplier management                                           |                                               |
| Green Purchasing (GPR)                                                                                                                     |                                               |
| GPR1- Our firm adopts green purchasing or buying environmentally friendly materials                                                        |                                               |
| GPR2- Our firm usually forwards notice to buyers on reduction of environmental impacts                                                     |                                               |
| GRP3- Our firm establishes standards for raw materials that do not contain prohibited substances                                           | [8,12,23 71–73,76,78,85– 87,92,95,96,102–105] |
| GPR4- Our firm usually pressures supplier(s) to take environmental actions                                                                 |                                               |
| GPR5- Our firm adopts environmental audit for suppliers’ internal management                                                               |                                               |

|                                                                                                                                                 |                                         |
|-------------------------------------------------------------------------------------------------------------------------------------------------|-----------------------------------------|
| GPR6- Our firm adopts second-tier supplier environmentally friendly practice evaluation                                                         |                                         |
| GPR7- Our firm usually provides design specifications to suppliers that include environmental requirements for purchased items                  |                                         |
| GPR8- Our firm evaluates suppliers on the basis of specific environmental criteria                                                              |                                         |
| GPR9- Our firm cooperates with suppliers who have environmental certifications such as ISO 14001                                                |                                         |
| GPR10- Our firm has partnerships with suppliers that aim to build environmental solutions and/or develop environment-friendly products          |                                         |
| <b>Green Manufacturing (GMF)</b>                                                                                                                |                                         |
| GMF1- Our firm strives to generate a minimum of waste and reduce environmental pollution                                                        |                                         |
| GMF2- Our firm is deliberately re-manufacturing and lean production                                                                             |                                         |
| GMF3- Our firm adopts cleaner production                                                                                                        |                                         |
| GMF4- Our firm strives to improve capacity utilization                                                                                          |                                         |
| GMF5- Our firm strives to reduce raw material costs, gain production efficiency, and improve their corporate image                              |                                         |
| GMF6- Our firm aims to increase the quantity of goods delivered on time                                                                         | [4,73– 76,78,86,87,89,92,95,96,106,107] |
| GMF7- Our firm does not use hazardous or prohibited materials during manufacturing and reduce waste during production                           |                                         |
| GMF8- Our firm is working on Substituting toxic inputs with environmentally friendly ones                                                       |                                         |
| GMF9- Our firm strives to switch from “dirty” technologies to cleaner technologies                                                              |                                         |
| GMF10- Our firm aims at internal recycling of waste                                                                                             |                                         |
| <b>Green Packaging (GPK)</b>                                                                                                                    |                                         |
| GPK1- Our firm adopts environmentally friendly packaging (environmentally friendly packaging)                                                   |                                         |
| GPK2- Our firm uses returnable packaging, reusable packaging, recyclable packaging                                                              | [4,12,78,108,109]                       |
| <b>Green Logistics (GLG)</b>                                                                                                                    |                                         |
| GLG1- Our firm uses environmentally friendly transportation                                                                                     |                                         |
| GLG2- Our firm adopts environmentally friendly distribution                                                                                     |                                         |
| GLG3- Our firm uses green fuels such as low sulfur content and alternative fuels such as liquid natural gas.                                    | [78,110– 112]                           |
| GLG4- Our firm supports community/environmental concerns, employee health, and safety during transportation.                                    |                                         |
| <b>Green outsourcing (GOS)</b>                                                                                                                  |                                         |
| GOSS1- Our firm adopts environmental responsibility care in global outsourcing.                                                                 |                                         |
| GO2- Our firm aims to Display an environmentally friendly culture to all external stakeholders.                                                 | [78,95,113]                             |
| <b>Green warehousing (GWH)</b>                                                                                                                  |                                         |
| GWH1- Our company adopts reducing stock levels                                                                                                  |                                         |
| GWH2- Our company adopts investment recovery (or) (selling) surplus stock/materials                                                             |                                         |
| GWH3- Our company adopts surplus capital equipment sale                                                                                         | [78,85]                                 |
| <b>(4) Firm Outcomes (FO)</b>                                                                                                                   |                                         |
| <b>Environmental Performance (En. Perf)</b>                                                                                                     |                                         |
| En. Perf1- Our firm has reduced air emissions during the last three years compared to competitors.                                              |                                         |
| En. Perf 2- Our firm has reduced pollution reduction of water during the last three years compared to competitors.                              |                                         |
| En. Perf 3- Our firm has reduced effluent wastes during the last three years compared to competitors.                                           |                                         |
| En. Perf 4- Our firm has reduced consumption of hazardous/toxic material during the last three years compared to competitors.                   |                                         |
| En. Perf 5- Our firm has reduced the environmental accident rate during the last three years compared to competitors.                           |                                         |
| En. Perf 6- Our firm has Improved an organization’s environmental situation during the last three years compared to competitors.                |                                         |
| En. Perf 7- Our firm has reduced solid wastes during the last three years compared to competitors.                                              | [8,11,23,40,70,73– 76,86,87,92,102]     |
| En. Perf 8- Our firm has adopted internal auditing of environmental performance during the last three years compared to competitors.            |                                         |
| En. Perf 9- Our firm has adopted external auditing of environmental performance during the last three years compared to competitors.            |                                         |
| En. Perf 10- Our firm has adopted the third-party certification of environmental practices during the last three years compared to competitors. |                                         |
| En. Perf 11- Our firm has sought to improve its environmental image/position during the last three years compared to competitors.               |                                         |
| En. Perf 12- Our firm has reduced energy consumption during the last three years compared to competitors.                                       |                                         |
| <b>Operational Performance (O. Perf)</b>                                                                                                        |                                         |
| O. Perf1- Our firm has improved on-time delivery rate during the last three years compared to competitors.                                      | [23,72]                                 |

|                                                                                                                                                                    |
|--------------------------------------------------------------------------------------------------------------------------------------------------------------------|
| O. Perf2- Our firm has decreased inventory levels during the last three years compared to competitors.                                                             |
| O. Perf3- Our firm has improved products' quality during the last three years compared to competitors.                                                             |
| O. Perf4- Our firm has reduced the scrap rate during the last three years compared to competitors.                                                                 |
| O. Perf5- Our firm has improved product line during the last three years compared to competitors.                                                                  |
| O. Perf6- Our firm has enhanced capacity utilization during the last three years compared to competitors.                                                          |
| O. Perf7- Our firm significantly has reduced lead times during the last three years compared to competitors.                                                       |
| O. Perf8- Our firm significantly has improved its position in the marketplace during the last three years compared to competitors.                                 |
| O. Perf9- Our firm has improved its chances of successfully selling its products in international markets.                                                         |
| O. Perf10- Our firm has achieved operational cost savings during the last three years compared to competitors.                                                     |
| O. Perf11- Our firm has developed a flexible system for rapid response to changes in orders/demand during the last three years compared to competitors.            |
| <i>Economic Performance (Ec. Perf)</i>                                                                                                                             |
| Ec. Perf1- Our firm decreased cost for materials purchasing and energy consumption                                                                                 |
| Ec. Perf2- Our firm decreased the fee for waste treatment and discharge                                                                                            |
| Ec. Perf3- Our firm decreased fine for environmental accidents                                                                                                     |
| Ec. Perf4- Green practices have helped our firm to improve the return average on sales and investment over the past three years                                    |
| Ec. Perf5- Green practices have helped our firm to improve the profit average and profit growth over the past three years                                          |
| Ec. Perf6- Green practices have helped our firm to improve the average market share growth over the past three years                                               |
| Ec. Perf7- Implementing green practices has improved productivity in our firm.                                                                                     |
| Ec. Perf8- Opting green practices has increased profitability in our firm.                                                                                         |
| Ec. Perf9- Green practices have helped our firm to increase market share.                                                                                          |
| Ec. Perf10- Implementing green practices has improved the earnings before interests' taxes and depreciation in our firm.                                           |
| Ec. Perf11- Implementing green practices has improved the delivery time average in our firm.                                                                       |
| Ec. Perf12- Implementing green practices has improved the payment period average in our firm.                                                                      |
| Ec. Perf13- Implementing green practices has improved the free cash flow in our firm.                                                                              |
| <b>Table S2: Final Table for Aspects and Practices</b>                                                                                                             |
| <i>(1) Institutional Pressure (IP)</i>                                                                                                                             |
| <i>Institutional Pressure (Coercive) (IPC)</i>                                                                                                                     |
| IPC1- The green environmental management of our firm will be influenced by national environmental regulations (such as waste emission, cleaner production, etc.)   |
| IPC2- The green environmental management of our firm will be influenced by regional environmental regulations (such as waste emissions, cleaner production, etc.). |
| IPC3- The green environmental management of our firm will be influenced by regional resource saving and protection regulations.                                    |
| IPC4- The green environmental management of our firm will be influenced by national resource saving and conservation regulations.                                  |
| <i>Institutional Pressure (Normative) (IPN)</i>                                                                                                                    |
| IPN1- In order to respond to the green environmental protection tendency, our firm will consider the effect on export.                                             |
| IPN2- In order to respond to the green environmental protection tendency, our firm will consider the effect on sales to foreign customers.                         |
| IPN3- In order to respond to the green environmental protection tendency, our firm will consider the effect on environmental requirements from domestic customers. |
| IPN4- For our firm, establishing the company's green image is extremely important.                                                                                 |
| <i>Institutional Pressure (Mimetic) (IPM)</i>                                                                                                                      |
| IPM1- The green environmental management of our firm will be affected by competitors' green environmental management protection strategy.                          |
| IPM2- The green environmental management of our firm will be affected by substitute products' green environmental strategy.                                        |
| IPM3- The green environmental management of our firm will be affected by professional environmental protection groups.                                             |
| <i>(2) Environmental Orientation (EO)</i>                                                                                                                          |
| <i>Internal Environmental Orientation (IEO)</i>                                                                                                                    |
| IEO1- Environmental responsibility is important to our business unit.                                                                                              |
| IEO2- Our company has clear policy statements urging environmental awareness in every area of operations.                                                          |
| IEO3- Environmental protection is highly valued by our company members.                                                                                            |
| IEO4- Environmental responsibility is a central corporate value of our company.                                                                                    |
| IEO5- Our company makes concerted efforts to help every employee understand the importance of environmental protection.                                            |
| <i>External Environmental Orientation (EEO)</i>                                                                                                                    |

[4,8,9,11,23,40,49,83,86,87]

|                                                                                                                                            |
|--------------------------------------------------------------------------------------------------------------------------------------------|
| EEO1- Developments in the natural environment affect our company's business activities.                                                    |
| EEO2- Our environmental responsibility affects our company's financial performance.                                                        |
| EEO3- Environmental responsibility is important to our company's survival.                                                                 |
| EEO4- The ability of our business unit to create a positive image of environmental responsibility is important.                            |
| EEO5- Various external stakeholders expect our company to protect the environment.                                                         |
| <b>(3) Green supply chain practices</b>                                                                                                    |
| <b>Supplier Environmental Collaboration (SEC)</b>                                                                                          |
| SEC1- Our firm collaborates with suppliers to build programs to reduce or eliminate waste                                                  |
| SEC2- Our firm shares environmental management techniques and knowledge.                                                                   |
| SEC3- Our firm monitors environmental compliance status and practices of supplier's operations                                             |
| SEC4- Our firm collaborates with suppliers to manage reverse flows of materials and packaging                                              |
| SEC5- Our firm communicates goals of sustainability to suppliers                                                                           |
| SEC6- Our firm helps suppliers to establish their own environmental management system                                                      |
| <b>Customer Environmental Collaboration (CEC)</b>                                                                                          |
| CEC2- Our firm cooperates with customers to design cleaner production processes                                                            |
| CEC3- Our firm cooperates with customers for using less energy during products transportation                                              |
| CEC4- Our firm cooperates with customers for the returned product                                                                          |
| CEC6- Our firm applies practices to provide consumers with information on environmentally friendly products and on production methods      |
| CEC7- Our firm cooperates with customers for green packaging                                                                               |
| <b>Internal Environmental Management (IEM)</b>                                                                                             |
| IEM1- Our firm emphasizes environmental management systems - ISO 14001 certification                                                       |
| IEM7- Our firm adopts total quality management with emphasis on the environment                                                            |
| IEM8- Our firm emphasizes replacement of toxic inputs by environmentally correct inputs                                                    |
| IEM9- Our firm emphasizes the use of fewer inputs to minimize environmental risks and impacts                                              |
| IEM11- Our firm emphasizes the use of ecolabels, taking into account environmental criteria                                                |
| IEM13- Our firm emphasizes cross-functional cooperation for environmental improvements                                                     |
| IEM16- Our firm has a system to track environmental laws and regulations                                                                   |
| <b>Eco-design (ECD)</b>                                                                                                                    |
| ECD1- Our firm emphasizes design of products for reduced consumption of material/energy                                                    |
| ECD2- Our firm emphasizes design products for reuse, recycling, recovery of materials and components                                       |
| ECD3- Our firm emphasizes design products to avoid or reduce the use of hazardous products in the manufacturing process.                   |
| ECD5- Our firm emphasizes design of products to reduce use of harmful/toxic material                                                       |
| ECD6- Our firm emphasizes optimization of design process to reduce air emission and noise                                                  |
| <b>Reverse Logistics (RLG)</b>                                                                                                             |
| RLG1- Our firm emphasizes reverse logistic                                                                                                 |
| RLG3- Our firm adopts the establishment of a transport system for the recycling of used and defective end-of-life products                 |
| RLG4- Our firm emphasizes the collection, management, and disposal of the product at the end of its life cycle                             |
| RGL8- Our firm emphasizes the use of remanufacturing                                                                                       |
| <b>Investment Recovery (INR)</b>                                                                                                           |
| INR1- Our firm emphasizes the sale of scrap, used materials, and surplus stocks                                                            |
| INR2- Our firm emphasizes the recovery of company equipment at end of life                                                                 |
| INR3- Our firm emphasizes the sale of unused raw materials                                                                                 |
| <b>Green Information Technology and Systems (GITS)</b>                                                                                     |
| GITS1- Our firm uses energy-efficient hardware and data centers                                                                            |
| GITS2- Our firm Consolidates servers using virtualization software                                                                         |
| GITS4- Our firm supports the Cooperative Group software                                                                                    |
| GITS5- Our firm Uses Eco-labelling of IT products                                                                                          |
| <b>Green Compliance (GCM)</b>                                                                                                              |
| GCM1- Our firm compliances with environmental laws in relation to international agreements and national guidelines                         |
| GCM2- Our firm emphasizes environmental management and Legal compliance                                                                    |
| GCM3- Our firm emphasizes compliance and environmental auditing programs, including environmental requirements of regulators and customers |
| GCM4- Our firm emphasizes compliance and environmental auditing for internal supplier management                                           |
| <b>Green Purchasing (GPR)</b>                                                                                                              |
| GPR1- Our firm adopts green purchasing or buying environmentally friendly materials                                                        |
| GPR2- Our firm usually forwards notices to buyers on the reduction of environmental impacts                                                |
| GPR3- Our firm establishes standards for raw materials that do not contain prohibited substances                                           |
| GPR6- Our firm adopts second-tier supplier environmentally friendly practice evaluation                                                    |
| GPR8- Our firm evaluates suppliers on the basis of specific environmental criteria                                                         |
| <b>Green Manufacturing (GMF)</b>                                                                                                           |
| GMF2- Our firm is deliberately re-manufacturing and lean production                                                                        |
| GMF3- Our firm adopts cleaner production                                                                                                   |
| GMF5- Our firm strives to reduce raw material costs, gain production efficiency, and improve their corporate image                         |

|                                                                                                                                                        |
|--------------------------------------------------------------------------------------------------------------------------------------------------------|
| GMF6- Our firm aims to increase the quantity of goods delivered on time                                                                                |
| GMF9- Our firm strives to switch from “dirty” technologies to cleaner technologies                                                                     |
| Green Logistics (GLG)                                                                                                                                  |
| GLG2- Our firm adopts environmentally friendly distribution                                                                                            |
| GLG3- Our firm uses green fuels such as low sulfur content and alternative fuels such as liquid natural gas.                                           |
| GLG4- Our firm supports community/environmental concerns, employee health, and safety during transportation.                                           |
| (4) Firm Outcomes (FO)                                                                                                                                 |
| Environmental Performance (En. Perf)                                                                                                                   |
| En. Perf1- Our firm has reduced air emissions during the last three years compared to competitors.                                                     |
| En. Perf2- Our firm has reduced pollution reduction of water during the last three years compared to competitors.                                      |
| En. Perf3- Our firm has reduced effluent wastes during the last three years compared to competitors.                                                   |
| En. Perf4- Our firm has reduced consumption of hazardous/toxic material during the last three years compared to competitors.                           |
| En. Perf5- Our firm has reduced the environmental accident rate during the last three years compared to competitors.                                   |
| Operational Performance (O. Perf)                                                                                                                      |
| O. Perf3- Our firm has improved products’ quality during the last three years compared to competitors.                                                 |
| O. Perf5- Our firm has improved product line during the last three years compared to competitors.                                                      |
| O. Perf7- Our firm significantly has reduced lead times during the last three years compared to competitors.                                           |
| O. Perf9- Our firm has improved its chances of successfully selling its products in international markets.                                             |
| O. Perf10- Our firm has achieved operational cost savings during the last three years compared to competitors.                                         |
| O. Perf11- Our firm has developed a flexible system for rapid response to change in orders/demand during the last three years compared to competitors. |
| Economic Performance (Ec. Perf)                                                                                                                        |
| Ec. Perf4- Green practices have helped our firm to improve the return average on sales and investment over the past three years                        |
| Ec. Perf5- Green practices have helped our firm to improve the profit average and profit growth over the past three years                              |
| Ec. Perf6- Green practices have helped our firm to improve the average of market share growth over the past three years                                |
| Ec. Perf8- Opting green practices has increased profitability in our firm.                                                                             |
| Ec. Perf9- Green practices have helped our firm to increase market share.                                                                              |
| Ec. Perf13- Implementing green practices has improved the free cash flow in our firm.                                                                  |

## Study Novelty

### What is already known about the study?

- The paper investigates the role of institutional pressures and environmental orientation that how they can help the firms to implement green supply chain practices (GSCPs).
- The aim is to construct a comprehensive model which is based on institutional theory (InT) and resource-based view (RBV) that will help to study the effect of GSCPs on the performance-based outcomes of industrial firms.

### Study Contribution/Value

- The study makes contribution towards building of GSCM field by assessing how institutional pressures and environmental orientation affects companies after adopting GSCM.
- The paper provides details about performance outcomes by scattering GSCM practices as well as provide direction to managers for successful implementation of these practices.

### Practical Implications on the field of Study

- The result of the study clearly supplied assistance to managers on the basic requirements for expanding and fulfilling successful and superior value green supply chain practices in their organizations.
- The managers can improve both the productivity and efficiency of their firms in search of sustainable economic advantages, by embracing and supporting environmentally friendly practices.

## References

1. Menon, A.; Menon, A. Enviropreneurial marketing strategy: The emergence of corporate environmentalism as market strategy. *J. Mark.* **1997**, *61*, 51–67.
2. Zailani, S.; Jeyaraman, K.; Vengadasan, G.; Premkumar, R. Sustainable supply chain management (SSCM) in Malaysia: A survey. *Int. J. Prod. Econ.* **2012**, *140*, 330–340, doi:10.1016/j.ijpe.2012.02.008.
3. Wu, G.-C.; Ding, J.-H.; Chen, P.-S. The effects of GSCM drivers and institutional pressures on GSCM practices in Taiwan’s textile and apparel industry. *Int. J. Prod. Econ.* **2012**, *135*, 618–636, doi:10.1016/j.ijpe.2011.05.023.
4. Pinto, L. Green supply chain practices and company performance in Portuguese manufacturing sector. *Bus. Strat. Environ.* **2020**, *29*, 1832–1849, doi:10.1002/bse.2471.

5. Wong, L. Corporate social responsibility in China: Between the market and the search for a sustainable growth development. *Asian Bus. Manag.* 2009, 8, 129–148.
6. Savita, K.; Dominic, P.; Ramayah, T. The adoption of green information technologies and systems as a driver within green SCM. Paper Presented at the Computer and Information Sciences (ICCOINS), Kuala Lumpur, Malaysia, 3–5 June 2014.
7. Huang, X.; Yang, S.; Shi, X. How Corporate Social Responsibility and External Stakeholder Concerns Affect Green Supply Chain Cooperation among Manufacturers: An Interpretive Structural Modeling Analysis. *Sustainability* 2021, 13, 2518, doi:10.3390/su13052518.
8. Zhu, Q.; Sarkis, J.; Lai, K.-H. Institutional-based antecedents and performance outcomes of internal and external green supply chain management practices. *J. Purch. Supply Manag.* 2013, 19, 106–117, doi:10.1016/j.pursup.2012.12.001.
9. Vanalle, R.M.; Ganga, G.M.D.; Filho, M.G.; Lucato, W. Green supply chain management: An investigation of pressures, practices, and performance within the Brazilian automotive supply chain. *J. Clean. Prod.* 2017, 151, 250–259, doi:10.1016/j.jclepro.2017.03.066.
10. Choi, D.; Hwang, T. The impact of green supply chain management practices on firm performance: The role of collaborative capability. *Oper. Manag. Res.* 2015, 8, 69–83, doi:10.1007/s12063-015-0100-x.
11. Ahmed, W.; Najmi, A.; Arif, M.; Younus, M. Exploring firm performance by institutional pressures driven green supply chain management practices. *Smart Sustain. Built Environ.* 2019, 8, 415–437, doi:10.1108/sasbe-04-2018-0022.
12. Azevedo, S.G.; Carvalho, H.; Machado, V. The influence of green practices on supply chain performance: A case study approach. *Transp. Res. Part E Logist. Transp. Rev.* 2011, 47, 850–871, doi:10.1016/j.tre.2011.05.017.
13. Dai, J.; Montabon, F.L.; Cantor, D.E. Linking rival and stakeholder pressure to green supply management: Mediating role of top management support. *Transp. Res. Part E Logist. Transp. Rev.* 2014, 71, 173–187, doi:10.1016/j.tre.2014.09.002.
14. Huang, Y.-C.; Huang, C.-H.; Yang, M.-L. Drivers of green supply chain initiatives and performance. *Int. J. Phys. Distrib. Logist. Manag.* 2017, 47, 796–819, doi:10.1108/ijpdlm-05-2017-0185.
15. Huang, Y.-C.; Huang, C.-H. Research on Relationships Among Institutional Pressure, Stewardship Behavior, Green Supply Chain Management, and Organizational Performance: The Case of Electrical and Electronics Industries in Taiwan. *J. Comput. Inf. Sci. Eng.* 2016, 16, 041010, doi:10.1115/1.4033435.
16. Yang, C.-S.; Lu, C.-S.; Haider, J.J.; Marlow, P.B. The effect of green supply chain management on green performance and firm competitiveness in the context of container shipping in Taiwan. *Transp. Res. Part E Logist. Transp. Rev.* 2013, 55, 55–73, doi:10.1016/j.tre.2013.03.005.
17. Lo, S.M.; Shiah, Y.-A. Associating the motivation with the practices of firms going green: The moderator role of environmental uncertainty. *Supply Chain Manag. Int. J.* 2016, 21, 485–498, doi:10.1108/scm-05-2015-0184.
18. Ye, F.; Zhao, X.; Prahinski, C.; Li, Y. The impact of institutional pressures, top managers' posture and reverse logistics on performance—Evidence from China. *Int. J. Prod. Econ.* 2013, 143, 132–143, doi:10.1016/j.ijpe.2012.12.021.
19. Chan, R.Y.K.; He, H.; Chan, H.K.; Wang, W.Y. Environmental orientation and corporate performance: The mediation mechanism of green supply chain management and moderating effect of competitive intensity. *Ind. Mark. Manag.* 2012, 41, 621–630, doi:10.1016/j.indmarman.2012.04.009.
20. Zhou, K.Z.; Li, J.J.; Zhou, N.; Su, C.; Market orientation, job satisfaction, product quality, and firm performance: Evidence from China. *Strateg. Manag. J.* 2008, 29, 985–1000.
21. Yu, Y.; Huo, B. The impact of environmental orientation on supplier green management and financial performance: The moderating role of relational capital. *J. Clean. Prod.* 2019, 211, 628–639, doi:10.1016/j.jclepro.2018.11.198.
22. Li, S.; Jayaraman, V.; Paulraj, A.; Shang, K.-C. Proactive environmental strategies and performance: Role of green supply chain processes and green product design in the Chinese high-tech industry. *Int. J. Prod. Res.* 2015, 54, 2136–2151, doi:10.1080/00207543.2015.1111532.
23. Younis, H.; Sundarakani, B.; Vel, P. The impact of implementing green supply chain management practices on corporate performance. *Compet. Rev.* 2016, 26, 216–245, doi:10.1108/cr-04-2015-0024.
24. Kung, F.; Huang, C.; Cheng, C. Assessing the green value chain to improve environmental performance: Evidence from Taiwan's manufacturing industry. *Int. J. Dev. Issues* 2012, 11, 111–128.
25. Eltayeb, T.K.; Zailani, S.; Ramayah, T. Green supply chain initiatives among certified companies in Malaysia and environmental sustainability: Investigating the outcomes. *Resour. Conserv. Recycl.* 2011, 55, 495–506, doi:10.1016/j.resconrec.2010.09.003.
26. Yang, M.G.; Hong, P.; Modi, S.B. Impact of lean manufacturing and environmental management on business performance: An empirical study of manufacturing firms. *Int. J. Prod. Econ.* 2011, 129, 251–261.
27. Wu, K.-J.; Liao, C.-J.; Tseng, M.-L.; Chiu, A.S.F. Exploring decisive factors in green supply chain practices under uncertainty. *Int. J. Prod. Econ.* 2015, 159, 147–157, doi:10.1016/j.ijpe.2014.09.030.

28. Vijayvargy, L.; Thakkar, J.; Agarwal, G. Green supply chain management practices and performance. *J. Manuf. Technol. Manag.* 2017, 28, 299–323, doi:10.1108/jmtm-09-2016-0123.
29. Ahmed, S.S.; Akter, T.; Ma, Y. Green Supply Chain Management (GSCM) Performance Implemented by the Textile Industry of Gazipur District, Dhaka. *Logistics* 2018, 2, 21, doi:10.3390/logistics2040021.
30. Mumtaz, U.; Ali, Y.; Petrillo, A. A linear regression approach to evaluate the green supply chain management impact on industrial organizational performance. *Sci. Total Environ.* 2018, 624, 162–169, doi:10.1016/j.scitotenv.2017.12.089.
31. Teixeira, A.A.; Jabbour, C.J.C.; Jabbour, A.B.L.D.S.; Latan, H.; Oliveira, J. Green training and green supply chain management: Evidence from Brazilian firms. *J. Clean. Prod.* 2016, 116, 170–176, doi:10.1016/j.jclepro.2015.12.061.
32. Geng, R.; Mansouri, S.A.; Aktas, E. The relationship between green supply chain management and performance: A meta-analysis of empirical evidences in Asian emerging economies. *Int. J. Prod. Econ.* 2017, 183, 245–258, doi:10.1016/j.ijpe.2016.10.008.
33. Agarwal, A.; Giraud-Carrier, F.C.; Li, Y. A mediation model of green supply chain management adoption: The role of internal impetus. *Int. J. Prod. Econ.* 2018, 205, 342–358, doi:10.1016/j.ijpe.2018.09.011.
34. DiMaggio, P.J.; Powell, W.W. The iron cage revisited: Institutional isomorphism and collective rationality in organizational fields. *Am. Sociol. Rev.* 1983, 48, 147–160.
35. Yang, C.-S. An analysis of institutional pressures, green supply chain management, and green performance in the container shipping context. *Transp. Res. Part D Transp. Environ.* 2018, 61, 246–260, doi:10.1016/j.trd.2017.07.005.
36. Rivera, J. Institutional Pressures and Voluntary Environmental Behavior in Developing Countries: Evidence from the Costa Rican Hotel Industry. *Soc. Nat. Resour.* 2004, 17, 779–797, doi:10.1080/08941920490493783.
37. Wernerfelt, B. A resource-based view of the firm. *Strateg. Manag. J.* 1984, 5, 171–180.
38. Choi, S.-B.; Min, H.; Joo, H.-Y. Examining the inter-relationship among competitive market environments, green supply chain practices, and firm performance. *Int. J. Logist. Manag.* 2018, 29, 1025–1048, doi:10.1108/ijlm-02-2017-0050.
39. Assumpção, J.J.; Campos, L.M.D.S.; Jabbour, A.B.L.D.S.; Jabbour, C.J.C.; Vazquez-Brust, D.A. Green Supply Chain Practices: A comprehensive and theoretically multidimensional framework for categorization. *Production* 2019, 29, 20190047, doi:10.1590/0103-6513.20190047.
40. Younis, H.; Sundarakani, B. The impact of firm size, firm age and environmental management certification on the relationship between green supply chain practices and corporate performance. *Benchmarking Int. J.* 2020, 27, 319–346, doi:10.1108/bij-11-2018-0363.
41. Barney, J.B. Strategic Factor Markets: Expectations, Luck, and Business Strategy. *Manag. Sci.* 1986, 32, 1231–1241, doi:10.1287/mnsc.32.10.1231.
42. Conner, K.R. A Historical Comparison of Resource-Based Theory and Five Schools of Thought Within Industrial Organization Economics: Do We Have a New Theory of the Firm? *J. Manag.* 1991, 17, 121–154, doi:10.1177/014920639101700109.
43. Boiral, O. Corporate Greening Through ISO 14001: A Rational Myth? *Organ. Sci.* 2007, 18, 127–146, doi:10.1287/orsc.1060.0224.
44. Miemczyk, J. An exploration of institutional constraints on developing end-of-life product recovery capabilities. *Int. J. Prod. Econ.* 2008, 115, 272–282, doi:10.1016/j.ijpe.2008.04.013.
45. Su-Yol, L. Drivers for the participation of small and medium-sized suppliers in green supply chain initiatives. *Supply Chain. Manag.* 2008, 13, 185–198.
46. Mathiyazhagan, K.; Diabat, A.; Al-Refaie, A.; Xu, L. Application of analytical hierarchy process to evaluate pressures to implement green supply chain management. *J. Clean. Prod.* 2015, 107, 229–236, doi:10.1016/j.jclepro.2015.04.110.
47. Chavez, R.; Yu, W.; Feng, M.; Wiengarten, F. The Effect of Customer-Centric Green Supply Chain Management on Operational Performance and Customer Satisfaction: Green Supply Chain Management and Performance. *Bus. Strat. Environ.* 2014, 25, 205–220, <https://doi.org/10.1002/bse.1868>.
48. Huang, Y.-C.; Wong, Y.-J.; Yang, M.-L. Proactive environmental management and performance by a controlling family. *Manag. Res. Rev.* 2014, 37, 210–240, doi:10.1108/mrr-09-2012-0196.
49. Saeed, A.; Jun, Y.; Nubuor, S.A.; Priyankara, H.P.R.; Jayasuriya, M.P.F. Institutional Pressures, Green Supply Chain Management Practices on Environmental and Economic Performance: A Two Theory View. *Sustainability* 2018, 10, 1517, doi:10.3390/su10051517.
50. Grant, R.M. The Resource-Based Theory of Competitive Advantage: Implications for Strategy Formulation. *Calif. Manag. Rev.* 1991, 33, 114–135, doi:10.2307/4116664.
51. Murray, J.Y.; Gao, G.Y.; Kotabe, M. Market orientation and performance of export ventures: The process through marketing capabilities and competitive advantages. *J. Acad. Mark. Sci.* 2011, 39, 252–269, doi:10.1007/s11747-010-0195-4.

52. Habib, M.; Bao, Y.; Nabi, N.; Dulal, M.; Asha, A.A.; Islam, M. Impact of Strategic Orientations on the Implementation of Green Supply Chain Management Practices and Sustainable Firm Performance. *Sustainability* 2021, 13, 340.
53. Qu, Y.; Yu, Y.; Appolloni, A.; Li, M.; Liu, Y. Measuring green growth efficiency for Chinese manufacturing industries. *Sustainability* 2017, 9, 637.
54. Hervani, A.A.; Helms, M.M.; Sarkis, J. Performance measurement for green supply chain management. *Benchmarking Int. J.* 2005, 12, 330–353, doi:10.1108/14635770510609015.
55. Lambert, D. *Supply Chain Management—Processes, Partnerships, Performance*, 3rd ed.; Supply Chain Management Institute: Sarasota, FL, USA, 2008.
56. Younis, H.; Sundarakani, B.; O'Mahony, B. Investigating the relationship between green supply chain management and corporate performance using a mixed method approach: Developing a roadmap for future research. *IIMB Manag. Rev.* 2019, 29, 1832–1849, doi:10.1016/j.iimb.2019.10.011.
57. Xie, X.; Zang, Z.; Qi, G. Assessing the environmental management efficiency of manufacturing sectors: Evidence from emerging economies. *J. Clean. Prod.* 2016, 112, 1422–1431, doi:10.1016/j.jclepro.2015.08.006.
58. Muñoz-Villamizar, A.; Santos, J.; Viles, E.; Ormazábal, M. Manufacturing and environmental practices in the Spanish context. *J. Clean. Prod.* 2018, 178, 268–275, doi:10.1016/j.jclepro.2018.01.026.
59. Hair, J.F.; Ringle, C.M.; Sarstedt, M. PLS-SEM: Indeed a Silver Bullet. *J. Mark. Theory Pract.* 2011, 19, 139–152, doi:10.2753/mtp1069-6679190202.
60. MacKenzie, S.B.; Podsakoff, P.M. Common Method Bias in Marketing: Causes, Mechanisms, and Procedural Remedies. *J. Retail.* 2012, 88, 542–555, doi:10.1016/j.jretai.2012.08.001.
61. Hair, J.F.; Hult, G.T.M.; Ringle, C.M.; Sarstedt, M. *Primer on Partial Least Squares Structural Equation Modeling (PLS-SEM)*, 2nd ed.; Sage: Thousand Oaks, CA, USA, 2017.
62. Fornell, C.; Larcker, D.F. Evaluating structural equation models with unobservable variables and measurement error. *J. Mark. Res.* 1981, 18, 39–50.
63. Gefen, D.; Straub, D. A practical guide to factorial validity using PLS-Graph: Tutorial and annotated example. *Commun. Assoc. Inf. Syst.* 2005, 16, 91–109.
64. Cohen, J. *Statistical Power Analysis for the Behavioral Sciences*, 2nd ed.; Academic Press: New York, NY, USA, 1988.
65. Kirchoff, J.F.; Tate, W.L.; Mollenkopf, D.A. The impact of strategic organizational orientations on green supply chain management and firm performance. *Int. J. Phys. Distrib. Logist. Manag.* 2016, 46, 269–292, doi:10.1108/ijpdlm-03-2015-0055.
66. Ke, W.; Liu, H.; Wei, K.K.; Gu, J.; Chen, H. How do mediated and non-mediated power affect electronic supply chain management system adoption? The mediating effects of trust and institutional pressures. *Decis. Support Syst.* 2009, 46(4), 839–851.
67. Liu, H.; Ke, W.; Wei, K.K.; Gu, J.; Chen, H. The role of institutional pressures and organizational culture in the firm's intention to adopt internet-enabled supply chain management systems. *J. Oper. Manage.* 2010, 28(5), 372–384.
68. Banerjee, S.B. Corporate environmentalism: The construct and its measurement, *J. Bus. Res.*, 2002, 55, 177–191.
69. Banerjee, S.B.; Iyer, E.S.; Kashyap, R.K. Corporate environmentalism: antecedents and influence of industry type, *J. Mark.* 2003, 67(2), 106–122.
70. Vachon, S.; Klassen, R. D. Extending green practices across the SC: The impact of upstream and downstream integration. *Int. J. Oper. Prod. Manage.* 2006, 26(7), 795–821.
71. Gunasekaran, A.; Lai, K.-h.; Cheng, T.E. Responsive supply chain: A competitive strategy in a networked economy. *Omega*. 2008, 36(4), 549–564.
72. Zhu, Q.; Sarkis, J.; Geng, Y. Green supply chain management in China: Pressures, practices and performance. *Int. J. Oper. Prod. Manage.* 2005, 25, 449–468, doi:10.1108/01443570510593148.
73. Chien, M.K.; Shih, L.H. An empirical study of the implementation of green supply chains management practices in the electrical and electronic industry and their relation to organizational performances, *Int. J. Sci. Technol.* 2007, 4(3), 383–394.
74. Green Jr., K.W.; Zelbst, P.J.; Meacham, J.; Bhaduria, V.S. Green supply chain management practices: impact on performance. *Supply Chain Manag. Int. J.* 2012, 17(3), 290–305.
75. Sarkis, J.; Koo, C.; Watson, R.T. Green information systems and technologies-this generation and beyond: Introduction to the special issue, *Information Systems Frontiers*, 2013, 15(5), 695.
76. Sarkis, J.; Bai, C.; Jabbour, A.B.; Jabbour, C.J.; Sobreiro, V.A. Connecting the pieces of the puzzle toward sustainable organizations: a framework integrating OM principles with GSCM, *Benchmarking: An International Journal*. 2016, 23(6), 1605–1623.
77. Miroshnichenko, I.; Barontini, R.; Testa, F. Green practices and financial performance: A global outlook. *J. Clean. Prod.* 2017, 147, 340–351.
78. Islam, S.; Karia, N.; Fauzi, F. B. A.; Soliman, M. S. M. A review on green supply chain aspects and practices. *Management and marketing. Challenges for the Knowledge Society*. 2017, 12(1), 12–36.

79. Santos, H., Lannelongue, G., Gonzalez-Benito, J. Integrating green practices into operational performance: Evidence from Brazilian manufacturers. *Sustainability*. 2019, 11, 2956.
80. Tseng, M., Islam, M., Kariab, N., Fauzib, A., Afrin, S. A literature review on green supply chain management: Trends and future challenge. *Resources, Conservation and Recycling*. 2019, 141, 145–162.
81. Zhu, Q., Geng, Y., Sarkis, J., Lai, K.H. Shifting Chinese organizational responses to evolving greening pressures", *Ecological Economics*. 2016, 121, 65–74.
82. Wan Mahmood, W., Ab Rahman, M., Md Deros, B., Jusoff, K., Saptari, A., Ebrahim, Z., Sultan, A., Abu Bakar, M., Subramonian, S., Jano, Z. Manufacturing Performance in Green Supply Chain Management, *World Applied Sciences Journal*, 2013, 21, 76–84.
83. Zhu, Q.; Geng, Y.; Tsuyoshi, F.; Hashimoto, S. Green supply chain management in leading manufacturers: Case studies in Japanese large companies. *Manag. Res. Rev.* 2010, 33, 380–392.
84. Lin, R.J. Using fuzzy DEMATEL to evaluate the green supply chain management practices, *J. Clean. Prod.* 2013, 40, 32–39.
85. Zhu, Q., Sarkis, J., Lai, K. Confirmation of a measurement model for green supply chain management practices implementation. *Int. J. Prod. Econ.* 2008, 111(2), 261–273.
86. Zhu, Q., Cote, R.P. Integrating green SCM into an embryonic eco-industrial development: A case study of the Guitang group. *J. Clean.Prod.* 2004, 12(8–10), 1025–1035.
87. Zhu, Q., Sarkis, J., Lai, K.H. Green supply chain management: pressures, practices and performance within the Chinese automobile industry, *J. Clean. Prod.* 2007, 15(11), 1041–1052.
88. Zhu, Q., Geng, Y., Sarkis, J., Lai, K.H. Evaluating green supply chain management among Chinese manufacturers from the ecological modernization perspective. *Transportation Research*. 2011, 47(6), 808–821.
89. Tseng, M.L., Chiu, A.S.F. Evaluating firm's green supply chain management in linguistic preferences, *J. Clean. Prod.* 2013, 40, 22–31.
90. Bowen, F., Cousins, P., Lamming, R., Faruk, A. Horse for courses: Explaining the gap between the theory and practice of green supply, *Greener Manag. Int.* 2001, 35, 41–60.
91. Zhu, Q., Zhang, Q. Evaluating practices and drivers of corporate social responsibility: the Chinese context, *J. Clean. Prod.* 2015, 100, 315–324.
92. Srivastava, S. K. Green supply-chain management: a state-of-the-art literature review. *Int. J. Manag. Rev.* 2007, 9(1), 53–80. <http://dx.doi.org/10.1111/j.1468-2370.2007.00202.x>.
93. Hu, A.H., Hsu, C.W. Critical factors for implementing green supply chain management practice: an empirical study of electrical and electronics industries in Taiwan, *Manag. Res. Rev.* 2010, 33(6), 586–608.
94. Beamon, B. Supply chain design and analysis: models and methods. *Int. J. Prod. Econ.* 1998, 55(3), 281–294.
95. Tseng, M.L., Divinagracia, L. Shi, L. Achieving green outsourcing performance in uncertainty, *Afr. J. Bus. Manag.* 2011, 5(14), 5946.
96. Balon, V. Green supply chain management: Pressures, practices, and performance – an integrative literature review. *Bus. Strategy Dev.* 2019, 3(2), 1–18.
97. Darnall, N., Jolley, G., Handfield, R. Environmental management systems and Green Supply Chain Management: complements for sustainability?, *Bus. Strategy Environ.* 2008, 17(1), 30–45.
98. Rao, P. Greening the supply chain: a new initiative in south East Asia, *Int. J. Oper. Prod. Manag.* 2002. 22(6), 632–655.
99. Büyüközkan, G., Çifçi, B. Designing a Sustainable Supply Chain Using an Integrated Analytic Network Process and Goal Programming Approach in Quality Function Deployment, *Expert Systems with Applications*. 2011, 38(11), 13731–13748.
100. Ahi, P.; Searcy, C. A comparative literature analysis of definitions for green and sustainable supply chain management. *J. Clean. Prod.* **2013**, 52, 329–341, doi:10.1016/j.jclepro.2013.02.018.
101. Holt, D. Ghobadian, A. An empirical study of green supply chain management practices amongst UK manufacturers. *J. Manuf. Technol. Manag.* 2009, 20(7), 933–956.
102. Rao, P. Holt, D. Do green supply chains lead to competitiveness and economic performance?, *Int. J. Oper. Prod. Manag.* 2005, 25(9), 898–916.
103. Carter, C.R. and Ellram, L.M. Reverse logistics: a review of the literature and framework for future investigation, *J. Bus. Logist.* 1998, 19(1), 85–102.
104. Zsidisin, G.A., Siferd, S.P. Environmental purchasing: a framework for theory development, *European Journal of Purchasing and Supply Management*, 2001, 7(1), 61–73.
105. Lee, S., Kim, S., Choi, D. Green supply chain management and organizational performance, *Ind. Manag. Data Syst.* 2012, 112(8), 1148–1180.
106. De Giovanni, P. Do internal and external environmental management contribute to the triple bottom line?, *Int. J. Oper. Prod. Manage.* 2012, 32(3), 265–290.
107. González-Torre, P.L., Adenso-D, B., Artiba, H. Environmental and reverse logistics policies in European bottling and packaging firms, *Int. J.Prod. Econ.* 2004, 88(1), 95–104.
108. Wu, H.J., Dunn, S.C. Environmentally responsible logistics systems. *Int. J. Phys. Distrib.* 1995, 25(2), 20–38.

109. González-Benito, J., González-Benito, Ó. A review of determinant factors of environmental proactivity. *Bus. Strategy Environ.* 2006, 15(2), 87–102.
110. Murphy, P.R. Poist, R.F. Green logistics strategies: an analysis of usage patterns, *Transportation Journal*, 2000, 40(2), 5–16.
111. Salimifard, K., Shahbandarzadeh, H. Raeesi, R. Green transportation and the role of operation research, *IPCSIT*, 2012, 26, 74–79
112. Babin, R., Nicholson, B. How green is my outsourcer? Measuring sustainability in global IT outsourcing. *Strategic Outsourcing: An International Journal*, **2011**, 4(1), 47–66.
113. Brown, D. It is good to be green: environmentally friendly credentials are influencing business outsourcing decisions, *Strategic Outsourcing: An International Journal*. **2008**, 1(1), 87–95.
